# Supplementary material for: Young People Seeking Help Online for Mental Health: Cross-Sectional Survey Study
Source: PubMed Central journal article supplement (PMC6732968; doi:10.2196/13524), 2019-08-26
Supplement: mental_v6i8e13524_app2.pdf [file mental_v6i8e13524_app2.pdf]

Table 1: SWEMWBS Results according to gender

|                   | n    | Mean    | Std. Deviation | Std. Error |
|-------------------|------|---------|----------------|------------|
| Male              | 242  | 19.4416 | 3.82944        | .24617     |
| Female            | 1027 | 18.9998 | 3.46647        | .10817     |
| Transgender       | 11   | 17.7791 | 3.03983        | .91654     |
| Non-binary        | 22   | 17.4218 | 2.24148        | .47788     |
| Prefer not to say | 6    | 17.1517 | 1.70090        | .69439     |
| Total             | 1308 | 19.0362 | 3.52199        | .09738     |

Table 2: GSHQ results

| Help source<br>(1="extremely unlikely"; 5="extremely likely")             | Mean (SD)  | 1<br>%(n)     | 2<br>%(n)     | 3<br>%(n)     | 4<br>%(n)     | 5<br>%(n)     |
|---------------------------------------------------------------------------|------------|---------------|---------------|---------------|---------------|---------------|
| <u>Informal Offline Sources</u>                                           |            |               |               |               |               |               |
| A friend                                                                  | 3.17(1.24) | 11.1<br>(145) | 23.6<br>(309) | 15.1<br>(198) | 37.4<br>(489) | 12.8<br>(167) |
| A parent                                                                  | 2.58(1.32) | 26.4<br>(345) | 28.1<br>(368) | 15.2<br>(199) | 21.4<br>(280) | 8.9<br>(116)  |
| Another relative/family member                                            | 1.93(1.08) | 44.9<br>(587) | 31.7<br>(414) | 10.6<br>(138) | 11.0<br>(144) | 1.9<br>(25)   |
| Intimate partner (e.g. girlfriend, boyfriend, partner, husband, wife)     | 3.37(1.37) | 15.2<br>(199) | 11.1<br>(145) | 20.4<br>(267) | 28.1<br>(367) | 25.2<br>(330) |
| <u>Formal Offline Sources</u>                                             |            |               |               |               |               |               |
| GP / family doctor                                                        | 1.77(0.94) | 50.9<br>(666) | 28.7<br>(376) | 13.6<br>(178) | 6.3<br>(82)   | 0.5<br>(6)    |
| Mental health professional (e.g. psychologist, social worker, counsellor) | 2.08(1.19) | 42.2<br>(555) | 27.6<br>(361) | 12.9<br>(169) | 13.5<br>(176) | 3.6<br>(47)   |
| Teacher / school counsellor                                               | 1.65(0.92) | 58.6<br>(766) | 25.3<br>(331) | 9.9<br>(130)  | 5.4<br>(71)   | 0.8<br>(10)   |

|                                                             |            |                |               |               |               |               |
|-------------------------------------------------------------|------------|----------------|---------------|---------------|---------------|---------------|
| Minister or religious leader (e.g. priest, rabbi, chaplain) | 1.15(0.45) | 89.7<br>(1173) | 7.0<br>(91)   | 2.2<br>(29)   | 1.1<br>(14)   | 0.1<br>(1)    |
| Phone helpline (e.g. Samaritans)                            | 1.51(0.81) | 65.1<br>(852)  | 23.5<br>(307) | 7.4<br>(97)   | 3.7<br>(48)   | 0.3<br>(4)    |
| <u>Other</u>                                                |            |                |               |               |               |               |
| I would not seek help from anyone                           | 3.15(1.25) | 11.0<br>(144)  | 23.5<br>(308) | 20.3<br>(265) | 30.1<br>(394) | 15.1<br>(197) |

Table 3: Young people's technology use

|                 | Own (yes)     | Access Internet (yes) | To look for help (yes) |
|-----------------|---------------|-----------------------|------------------------|
|                 | n(%)          | n(%)                  | n(%)                   |
| Mobile Phone    | 1303 (99.62%) | 1232 (94.19%)         | 1055 (80.66%)          |
| Laptop/Computer | 1208 (92.35%) | 246 (18.81%)          | 427 (32.65%)           |
| Tablet          | 509 (38.91%)  | 43 (3.29%)            | 54 (4.13%)             |
| Games Console   | 446 (34.10%)  | 12 (0.92%)            | 0 (0%)                 |

Table 4: Preferred online resources

|                                 | Females<br>(yes) | Males<br>(yes)  | Non-<br>binary<br>(yes) | Transgender<br>(yes) | Prefer<br>not to<br>say (yes) | Total<br>(yes)   |
|---------------------------------|------------------|-----------------|-------------------------|----------------------|-------------------------------|------------------|
| N                               | 1027             | 242             | 22                      | 11                   | 6                             |                  |
| Health<br>website               | 602<br>(58.62%)  | 123<br>(50.83%) | 13<br>(59.09%)          | 4 (36.36%)           | 4<br>(66.67%)                 | 746<br>(57.03%)  |
| Mental<br>Health<br>App         | 132<br>(12.85%)  | 24<br>(9.92%)   | 3<br>(13.64%)           | 0 (0%)               | 0 (0%)                        | 159<br>(12.16%)  |
| Internet<br>Search              | 848<br>(82.57%)  | 195<br>(80.58%) | 20<br>(90.91%)          | 11 (100%)            | 6 (100%)                      | 1080<br>(82.57%) |
| Influencer<br>/blogger          | 82<br>(7.98%)    | 21<br>(8.68%)   | 3<br>(13.64%)           | 1 (9.09%)            | 0 (0%)                        | 107<br>(8.18%)   |
| Forums /<br>discussion<br>board | 323<br>(31.45%)  | 86<br>(35.54%)  | 10<br>(45.45%)          | 1 (9.09%)            | 2<br>(33.33%)                 | 422<br>(32.26%)  |
| Websites<br>already<br>used     | 118<br>(11.49%)  | 13<br>(5.37%)   | 4<br>(18.18%)           | 0 (0%)               | 1<br>(16.67%)                 | 136<br>(10.40%)  |
